# Supplementary material for: Inter-element variation in the bone histology of Anteosaurus (Dinocephalia, Anteosauridae) from the Tapinocephalus Assemblage Zone of the Karoo Basin of South Africa
Source: PeerJ. 2021 Sep 8;9:e12082. doi: 10.7717/peerj.12082 (PMC8434808; doi:10.7717/peerj.12082)
Supplement: Supplemental Information 1 — All the material was recovered from the Tapinocephalus Assemblage Zone (Beaufort Group, Karoo Supergroup), South Africa. Abbreviations: SAM, Iziko South African Museums, Cape Town, South Africa; BP, Evol [file peerj-09-12082-s001.xls]

## Sheet: Sheet1
Skeletal elements of Anteosaurus specimens studied. All the material was recovered from the Tapinocephalus Assemblage Zone (Beaufort Group, Karoo Supergroup), South Africa. Abbreviations: SAM, Iziko South African Museums, Cape Town, South Africa; BP, Evolutionary Sciences Institute (previously Bernard Price Institute), University of the Witwatersrand, Johannesburg, South Africa. Source of informa…
Accesson number	Field Number	Element	Taxon Assignment	Identification	Identification	Country-State	Geology	Group	Biozone
SAM-PK-12088a		Femur	Dinocephalia	Anteosaurus magnificus	Sewefontein	RSA	Karoo	Beaufort	Tapinocephalus Assemblage Zone
SAM-PK-12088b		Proximal radius	Dinocephalia	Anteosaurus magnificus	Sewefontein	RSA	Karoo	Beaufort	Tapinocephalus Assemblage Zone
SAM-PK-12088c		Ulna	Dinocephalia	Anteosaurus magnificus	Sewefontein	RSA	Karoo	Beaufort	Tapinocephalus Assemblage Zone
SAM-PK-12088d		Ulna head	Dinocephalia	Anteosaurus magnificus	Sewefontein	RSA	Karoo	Beaufort	Tapinocephalus Assemblage Zone
BP/1/5591b	95/2/H3	Fibula	Dinocephalia	Anteosaurus sp.	Rheboksfontein	RSA	Karoo	Beaufort	Tapinocephalus Assemblage Zone
BP/1/5591c	95/2/H3	Proximal rib	Dinocephalia	Anteosaurus sp.	Rheboksfontein	RSA	Karoo	Beaufort	Tapinocephalus Assemblage Zone
BP/1/5591d	95/2/H3	Rib midshaft	Dinocephalia	Anteosaurus sp.	Rheboksfontein	RSA	Karoo	Beaufort	Tapinocephalus Assemblage Zone
